# Supplementary material
Source: PubMed Central journal article supplement (PMC3833427)
Supplement: supp_140.23.4672_DEV093286.pdf [file supp_140.23.4672_DEV093286.pdf]

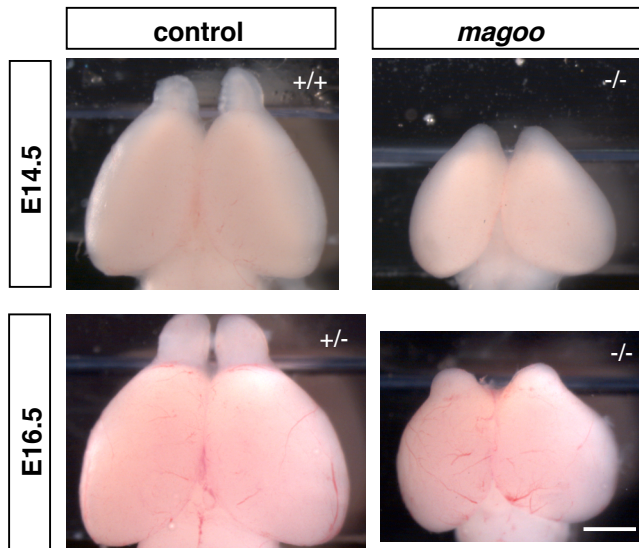

**Figure S1. (Supplement to Figure 1)**

**Cortical hemisphere area of *magoo* mutants is reduced at all ages.**

Dorsal views of whole forebrains of E14.5 and E16.5 embryos. Scale bar, 1mm for all panels.

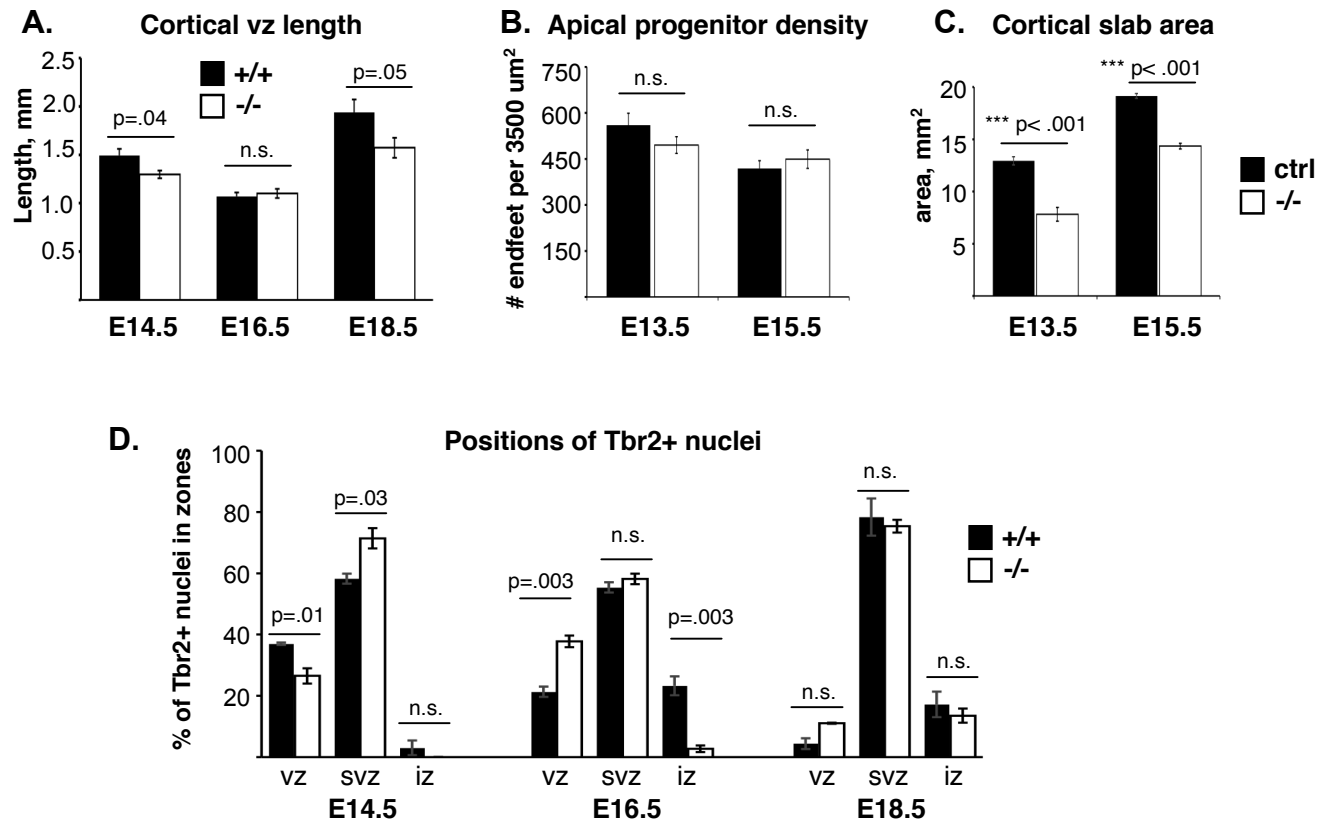

**Figure S2. (Supplement to Figure 2)**

A. Neocortex ventricular zone contour length is slightly reduced in cortical sections of E14.5 and E18.5 *magoo* mutants. Sections at the level of the hippocampus were compared. Curve length was measured between the ventricle “corners” at the cortico-striatal boundary and the dorsal midline. For E14.5, n=10 mutant and 16 control hemisections. For E16.5, n= 15 mutant and 16 control hemisections. For E18.5, n= 9 mutant and 6 control hemisections.

B. Cortical apical progenitor density is similar in controls and *magoo* mutants at E13.5 and E15.5. The number of apical progenitor endfeet per field were counted in images of zo-1 staining on cortical slabs such as in Figure 7G,H. The number of neocortical apical endfeet should be very close to the number of neocortical Pax6+ nuclei. For E13.5, n= 9 control hemispheres from 8 animals, n=8 mutant hemispheres from 5 animals. For E15.5, n= 10 control hemispheres from 6 animals, n= 4 mutant hemispheres from 2 animals.

C. Cortical slabs (trimmed to neocortex only) from *magoo* mutant brains had significantly reduced apical surface area. n’s are same as for graph in B.

D. The positions of Tbr2+ nuclei were scored in vz, svz, or iz (intermediate zone).

In E16.5 mutants, a higher percentage of the Tbr2+ nuclei are located in the vz, compared to controls. n’s are same as for Figure 2B-D.

**Table S1. Antibodies used**

| Antigen                                     | Manufacturer                            | Manufacturer Location    | Catalogue #                                 | Host Species       | Dilution        |
|---------------------------------------------|-----------------------------------------|--------------------------|---------------------------------------------|--------------------|-----------------|
| <b>Primary Antibodies:</b>                  |                                         |                          |                                             |                    |                 |
| 4a4 (phospho-vimentin) (Ser55, IgG2b)       | Medical and Biological Labs             | Nagoya, Japan            | D076-3                                      | Mouse monoclonal   | 1:500           |
| Anillin                                     | Santa Cruz                              | Santa Cruz, CA, USA      | sc-67327                                    | Rabbit polyclonal  | 1:300           |
| Aurora B                                    | Abcam                                   | Cambridge, MA, USA       | ab13824                                     | Mouse monoclonal   | 1:300           |
| BrdU (clone 3D4)                            | BD Biosciences,                         | San Jose, CA, USA        | 555627                                      | Mouse monoclonal   | 1:100           |
| Catenin (beta)                              | Gift from B. Gumbiner                   | Charlottesville, VA, USA |                                             | Rabbit polyclonal  | 1:1000          |
| Cleaved Caspase 3 (Asp175)                  | Cell Signaling                          | Danvers, MA, USA         | 9761                                        | Rabbit polyclonal  | 1:200           |
| Ctip2                                       | Abcam                                   | Cambridge, MA, USA       | ab18465                                     | Rat polyclonal     | 1:500           |
| Cux1                                        | Santa Cruz                              | Santa Cruz, CA, USA      | sc-6327                                     | Goat polyclonal    | 1:500           |
| Ki67 (Alexa Fluor 647-conjugated)           | eBioscience                             | San Diego, CA, USA       | 51-5698-80                                  | Rat polyclonal     | 1:500           |
| KIF20B (MPP1, human)                        | Gift from F.Pirollet                    | Grenoble, France         |                                             | Rabbit polyclonal  | 1:500           |
| Kif20b (mouse)                              | Covance (custom-made)                   | Princeton, NJ, USA       |                                             | Rabbit polyclonal  | 1:300           |
| MPM2                                        | EMD Millipore                           | Billerica, MA, USA       | 05-368                                      | Mouse monoclonal   | 1:250           |
| Pax6                                        | DSHB                                    | Iowa City, IA, USA       | PAX6                                        | Mouse monoclonal   | 1:100           |
| Pax6                                        | Covance                                 | Princeton, NJ, USA       | PRB-278P                                    | Rabbit polyclonal  | 1:50 (paraffin) |
| Phosphohistone H3 (Ser 10, Alexa Fluor 647) | Cell Signaling                          | Danvers, MA, USA         | 3458                                        | Rabbit polyclonal  | 1:200           |
| Phosphohistone H3 (Ser 10)                  | EMD Millipore                           | Billerica, MA, USA       | 06-570                                      | Rabbit polyclonal  | 1:200           |
| Tbr2                                        | Abcam                                   | Cambridge, MA, USA       | ab31940                                     | Rabbit polyclonal  | 1:500           |
| Tbr2                                        | eBioscience                             | San Diego, CA, USA       | 14-4875                                     | Rat monoclonal     | 1:50 (paraffin) |
| Tbr2                                        | EMD Millipore                           | Billerica, MA, USA       | AB15894                                     | Chicken polyclonal | 1:400           |
| Tuj1                                        | Covance                                 | Princeton, NJ, USA       | MMS-435P                                    | Rabbit polyclonal  | 1:1000          |
| ZO-1                                        | Life technologies (formerly Invitrogen) | Grand Island, NY, USA    | 61-7300                                     | Rabbit polyclonal  | 1:200           |
| ZO-1 (R26.4C)                               | DSHB                                    | Iowa City, IA, USA       | R26.4DC                                     | Rat polyclonal     | 1:200           |
| <b>Secondary Antibodies:</b>                |                                         |                          |                                             |                    |                 |
| IgG (H+L) conjugated to Alexa fluorophores  | Life technologies (formerly Invitrogen) | Grand Island, NY, USA    | A11008,A11001, A11036,A11006, A11004,A11077 | Goat polyclonal    | 1:200           |
| IgG rat biotin-conjugated                   | ThermoFisher Scientific                 | Pittsburgh, PA, USA      | NC9502806                                   | Goat polyclonal    | 1:200           |
| IgM mouse biotin-conjugated                 | Vector                                  | Burlingame, CA, USA      | NC9023089                                   | Goat polyclonal    | 1:200           |
